# Supplementary material
Source: PubMed Central journal article supplement (PMC5201438)
Supplement: NIHMS836041-supplement-Suppl_Fig1.pdf [file NIHMS836041-supplement-Suppl_Fig1.pdf]

ATG GGT CAA ATA GTA ACG ATG TTT GAA GCG TTA CCG CAT ATA ATA GAT  
 GAA GTA ATA AAT ATA GTA ATA ATA GTA TTA ATA GTA ATA ACG GGT ATA  
 AAA GCG GTA TAT AAT TTT GCG ACG TGT GGT ATA TTT GCG TTA ATA TCG  
 TTT TTA TTA TTA GCG GGT CGT TCG TGT GGT ATG TAT GGT TTA AAA GGT  
 CCG GAT ATA TAT AAA GGT GTA TAT CAA TTT AAA TCG GTA GAA TTT GAT  
 ATG TCG CAT TTA AAT TTA ACG ATG CCG AAT GCG TGT TCG GCG AAT AAT  
 TCG CAT CAT TAT ATA TCG ATG GGT ACG TCG GGT TTA GAA TTA ACG TTT  
 ACG AAT GAT TCG ATA ATA TCG CAT AAT TTT TGT AAT TTA ACG TCG GCG  
 TTT AAT AAA AAA ACG TTT GAT CAT ACG TTA ATG TCG ATA GTA TCG TCG  
 TTA CAT TTA TCG ATA CGT GGT AAT TCG AAT TAT AAA GCG GTA TCG TGT  
 GAT TTT AAT AAT GGT ATA ACG ATA CAA TAT AAT TTA ACG TTT TCG AAT  
 GCG CAA TCG GCG CAA TCG CAA TGT CGT ACG TTT CGT GGT CGT GTA TTA  
 GAT ATG TTT CGT ACG GCG TTT GGT GGT AAA TAT ATG CGT TCG GGT TGG  
 GGT TGG ACG GGT TCG GAT GGT AAA ACG ACG TGG TGT TCG CAA ACG TCG  
 TAT CAA TAT TTA ATA ATA CAA AAT CGT ACG TGG GAA AAT CAT TGT ACG  
 TAT GCG GGT CCG TTT GGT ATG TCG CGT ATA TTA TTA TCG CAA GAA AAA  
 ACG AAA TTT TTT ACG CGT CGT TTA GCG GGT ACG TTT ACG TGG ACG TTA  
 TCG GAT TCG TCG GGT GTA GAA AAT CCG GGT GGT TAT TGT TTA ACG AAA  
 TGG ATG ATA TTA GCG GCG GAA TTA AAA TGT TTT GGT AAT ACG GCG GTA  
 GCG AAA TGT AAT GTA AAT CAT GAT GAA GAA TTT TGT GAT ATG TTA CGT  
 TTA ATA GAT TAT AAT AAA GCG GCG TTA TCG AAA TTT AAA GAA GAT GTA  
 GAA TCG GCG TTA CAT TTA TTT AAA ACG ACG GTA AAT TCG TTA ATA TCG  
 GAT CAA TTA TTA ATG CGT AAT CAT TTA CGT GAT TTA ATG GGG GTA CCG  
 TAT TGT AAT TAT TCG AAA TTT TGG TAT TTA GAA CAT GCG AAA ACG GGT  
 GAA ACG TCG GTA CCG AAA TGT TGG TTA GTA ACG AAT GGT TCG TAT TTA  
 AAT GAA ACG CAT TTT TCG GAT CAA ATA GAA CAA GAA GCG GAT AAT ATG  
 ATA ACG GAA ATG TTA CGT AAA GAT TAT ATA AAA CGT CAA GGT TCG ACG  
 CCG TTA GCG TTA ATG GAT TTA TTA ATG TTT TCG ACG TCG GCG TAT TTA  
 GTA TCG ATA TTT TTA CAT TTA GTA AAA ATA CCG ACG CAT CGT CAT ATA  
 AAA GGT GGT TCG TGT CCG AAA CCG CAT CGT TTA ACG AAT AAA GGT ATA  
 TGT TCG TGT GGT GCG TTT AAA GTA CCG GGT GTA AAA ACG GTA TGG AAA  
 CGT CGT TGA

**Supplementary Figure 1. DNA sequence of LCMV GP CD:** Nucleotide substitutions made due to codon deoptimization are indicated in red.
